# Supplementary material for: Prognostic Value of Resistance Proteins in Plasma Cells from Multiple Myeloma Patients Treated with Bortezomib-Based Regimens
Source: MDPI journal article supplement (doi:10.3390/jcm10215028), 2021-10-28
Supplement: s1 [file s1]

Supplementary Captions.

**Table S1.** Normalized protein expression values for all samples and most important clinical variables.

**Table S2.** Normalized protein levels according to ISS stage. Data are presented as mean and SD.

**Table S3.** Normalized protein levels according to previous treatment. Data are presented as mean and SD.

**Table S4.** Normalized protein levels according to anemia at the diagnosis. Data are presented as mean and SD.

**Table S5.** Protein levels according to hypercalcemia at the diagnosis. Data are presented as mean and SD.

**Table S6.** Normalized protein levels according to renal failure at the diagnosis. Data are presented as mean and SD.

**Table S7.** Normalized protein levels according to bone disease at the diagnosis. Data are presented as mean and SD.

**Table S8.** Normalized protein levels according to the response to bortezomib-based chemotherapy according to the IMWG criteria. Data are presented as mean and SD.

**Table S9.** Normalized protein levels according to refractoriness to bortezomib. Data are presented as mean and SD.

**Table S10.** The optimal cutpoints for protein levels determined by Cutoff Finder.

**Table S11.** Univariate Cox regression analyses of dichotomized protein levels for progression-free survival for patients without previous treatment (N=29).

**Table S12.** The optimal cutpoints for protein levels determined by Cutoff Finder for PFS of patients without previous treatment (N=29).

**Table S1.** Normalized protein expression values for all samples and most important clinical variables.

Patient ID,POMP normalized,PSMB5 normalized,NRF2 normalized,XBP1 normalized,cMAF normalized,MAFB normalized,Refractoriness,ISS,Previous treatment,Progression,PFS,OS,Death,ASCT  
20,0.151273885,1.51050955,0.014996815,0.430254777,0.190796178,1398.08917,0,,0,0,19.4666667,19.4666667,1,1  
21,0.170496894,1.62360248,0.020068323,0.488819876,0.214192547,1751.5528,0,III,0,1,12.4666667,39.5,0,1  
25,0.21986755,2.32582781,0.014536424,0.42218543,0.204470199,2009.93377,0,I,0,0,35.0333333,35.0333333,0,1  
26,0.155095541,0.161783439,0.018904459,0.458917197,0.185127389,1668.78981,0,II,0,0,35.3666667,35.3666667,0,1  
27,0.14760479,1.46586826,0.014350299,0.432934132,0.190658683,2170.65868,1,I,1,1,4.7,31.2666667,1,0  
28,0.103492063,1.41650794,0.01404127,0.427301587,0.181968254,1311.11111,0,I,0,1,32.4,35.9666667,0,1  
30,0.200928793,1.7498452,0.018690403,0.460990712,0.20377709,1888.54489,0,III,0,1,7.6666667,8.0666667,1,0  
33,0.190909091,1.43039773,0.01615625,0.472443182,0.161477273,1806.81818,0,II,0,1,36.3,36.3,0,1  
34,0.151446945,1.35948553,0.017263666,0.433440514,0.17829582,1279.74277,0,II,1,1,10.8666667,18.6333333,1,1  
36,0.172755418,2.02352941,0.018306502,0.492879257,0.237832817,1622.29102,0,III,0,1,1.2,34.9666667,0,1  
37,0.143086817,1.71028939,0.015717042,0.464951768,0.221028939,1559.48553,0,III,0,1,4.6,35.6666667,0,1

38,0.155974843,1.85597484,0.015993711,0.435849057,0.224433962,1783.01887,0,II,0,1,14.2666667,44.3333333,0,1  
40,0.161587302,1.75809524,0.018876191,0.464126984,0.222031746,1850.79365,0,I,0,1,33.2,34.1333333,0,1  
41,0.142507645,1.53639144,0.017810398,0.455963303,0.217492355,1868.50153,0,III,0,1,11.7666667,13.7666667,1,0  
43,0.134202899,1.13942029,0.011295652,0.42,0.211768116,1321.73913,1,III,0,1,3.76666667,21.9333333,1,0  
52,0.205740181,2.00845921,0.015755287,0.479154079,0.177915408,1477.34139,1,III,0,1,1.03333333,12.4,1,0  
56,0.204746835,1.35727848,0.016237342,0.468987342,0.181297468,1462.02532,1,III,0,1,1.63333333,12.3666667,1,0  
58,0.153416149,1.71149068,0.015726708,0.464596273,0.19826087,1975.15528,0,II,1,1,12.5666667,42.0666667,0,0  
61,0.14925816,1.28724036,0.016130564,0.446884273,0.199910979,1727.00297,1,III,0,1,3.76666667,21.9333333,1,0  
64,0.166984127,1.73396825,0.017215873,0.459047619,0.213714286,1946.03175,1,II,1,1,7.06666667,17.7333333,1,0  
65,0.16,1.65016393,0.019334426,0.46852459,0.234360656,1931.14754,0,III,0,1,13.7,26.9666667,1,0  
73,0.139263804,1.45214724,0.017901841,0.432822086,0.189079755,1524.53988,0,I,0,1,29.5,56.7666667,0,1  
74,0.164240506,1.51297468,0.018012658,0.461392405,0.181044304,2212.02532,0,III,0,1,34.8,59.3333333,1,0  
78,0.175609756,1.50060976,0.016689024,0.418902439,0.211158537,1896.34146,1,I,1,1,1.03333333,1.26666667,1,0  
83,0.160909091,1.92818182,0.014227273,0.472424242,0.221090909,1466.66667,0,III,0,1,9.83333333,11.5333333,1,0  
84,0.142207792,1.71525974,0.018525974,0.474675325,0.244383117,1142.85714,0,III,1,1,13.2666667,16.0666667,1,1  
85,0.146290801,1.32967359,0.017186944,0.39851632,0.188071217,1703.26409,1,III,1,1,8.3,31.0333333,0,1  
86,0.205571031,1.72618384,0.01732312,0.369637883,0.228022284,1637.88301,0,III,0,1,20.3,27.0333333,1,1  
89,0.1678125,1.39125,0.0172375,0.4509375,0.1820625,2243.75,0,I,0,1,29.1666667,49.4666667,1,1  
90,0.173114754,1.9652459,0.020839344,0.423934426,0.225737705,2540.98361,0,II,0,1,8.16666667,21.0666667,1,0  
91,0.137650602,1.87138554,0.016409639,0.445481928,0.201174699,1939.75904,0,III,1,1,5.13333333,28.2333333,0,0  
92,0.135060976,1.47042683,0.016121951,0.430792683,0.177835366,1637.19512,0,I,0,1,10.5,29.7666667,1,0  
93,0.135504886,1.62801303,0.016276873,0.486644951,0.181335505,1657.98046,1,,0,1,12.0333333,33.9666667,0,0  
94,0.205475504,2.00864553,0.017507205,0.440345821,0.214005764,2285.30259,0,III,0,1,11.7666667,12.0333333,1,0  
101,0.214144737,2.13651316,0.016411184,0.422039474,0.226348684,1894.73684,1,I,0,1,22.6666667,23.2666667,0,0  
114,0.149262537,1.33362832,0.012386431,0.413274336,0.154100295,1336.28319,1,I,0,1,1.73333333,1.83333333,0,0  
115,0.113489736,1.39618768,0.017548387,0.378005865,0.218856305,973.607038,1,I,1,1,3.03333333,39.1333333,1,1  
118,0.129216867,1.61295181,0.013593374,0.402409639,0.172379518,1228.91566,0,,1,1,11.6333333,20.7,0,1  
119,0.206461538,1.972,0.019187692,0.426153846,0.203292308,2089.23077,1,I,0,1,10.5,29.7666667,1,0

**Table S2.** Normalized protein levels according to ISS stage. Data are presented as mean and SD.

| Variable | ISS I/II | SD     | ISS III | SD.    | p-value |
|----------|----------|--------|---------|--------|---------|
| POMP     | 0.16     | 0.03   | 0.17    | 0.03   | 0.6322  |
| PSMB5    | 1.54     | 0.45   | 1.68    | 0.28   | 0.3641  |
| NRF2     | 0.017    | 0.002  | 0.017   | 0.002  | 0.9069  |
| XBPI     | 0.44     | 0.02   | 0.45    | 0.03   | 0.1094  |
| cMAF     | 0.20     | 0.02   | 0.21    | 0.02   | 0.0383  |
| MAFB     | 1757.25  | 390.04 | 1716.23 | 293.05 | 0.7262  |

**Table S3.** Normalized protein levels according to previous treatment. Data are presented as mean and SD.

| Variable     | No previous treatment | SD     | Previous treatment | SD     | <i>p</i> -value |
|--------------|-----------------------|--------|--------------------|--------|-----------------|
| <b>POMP</b>  | 0.17                  | 0.03   | 0.15               | 0.02   | 0.0350          |
| <b>PSMB5</b> | 1.62                  | 0.40   | 1.57               | 0.19   | 0.4121          |
| <b>NRF2</b>  | 0.019                 | 0.002  | 0.016              | 0.002  | 0.6760          |
| <b>XBP1</b>  | 0.45                  | 0.03   | 0.43               | 0.03   | 0.1113          |
| <b>cMAF</b>  | 0.20                  | 0.02   | 0.20               | 0.02   | 0.9843          |
| <b>MAFB</b>  | 1757.41               | 310.81 | 1625.63            | 426.24 | 0.3009          |

**Table S4.** Normalized protein levels according to anemia at the diagnosis. Data are presented as mean and SD.

| Variable     | HB $\geq 10$ g/dL at diagnosis | SD     | HB $< 10$ g/dL at diagnosis | SD     | <i>p</i> -value |
|--------------|--------------------------------|--------|-----------------------------|--------|-----------------|
| <b>POMP</b>  | 0.17                           | 0.03   | 0.16                        | 0.03   | 0.2114          |
| <b>PSMB5</b> | 1.61                           | 0.42   | 1.61                        | 0.25   | 0.8678          |
| <b>NRF2</b>  | 0.017                          | 0.002  | 0.017                       | 0.002  | 0.5875          |
| <b>XBP1</b>  | 0.44                           | 0.03   | 0.44                        | 0.03   | 0.9918          |
| <b>cMAF</b>  | 0.199                          | 0.02   | 0.21                        | 0.02   | 0.2262          |
| <b>MAFB</b>  | 1737.64                        | 345.26 | 1734.92                     | 336.98 | 0.9813          |

**Table S5.** Protein levels according to hypercalcemia at the diagnosis. Data are presented as mean and SD.

| Variable     | Calcium $\leq 2.5$ mmol/L at diagnosis | SD     | Calcium $> 2.5$ mmol/L at diagnosis | SD     | <i>p</i> -value |
|--------------|----------------------------------------|--------|-------------------------------------|--------|-----------------|
| <b>POMP</b>  | 0.16                                   | 0.03   | 0.17                                | 0.03   | 0.6292          |
| <b>PSMB5</b> | 1.60                                   | 0.41   | 1.65                                | 0.21   | 0.6292          |
| <b>NRF2</b>  | 0.016                                  | 0.002  | 0.018                               | 0.002  | 0.5875          |
| <b>XBP1</b>  | 0.44                                   | 0.03   | 0.45                                | 0.02   | 0.9918          |
| <b>cMAF</b>  | 0.20                                   | 0.02   | 0.20                                | 0.02   | 0.2262          |
| <b>MAFB</b>  | 1663.82                                | 333.04 | 1915.38                             | 289.76 | 0.9813          |

**Table S6.** Normalized protein levels according to renal failure at the diagnosis. Data are presented as mean and SD.

| Variable     | Creatinine $\leq 2$ mg/dL<br>at diagnosis | SD     | Creatinine $> 2$ mg/dL<br>at diagnosis | SD     | <i>p</i> -value |
|--------------|-------------------------------------------|--------|----------------------------------------|--------|-----------------|
| <b>POMP</b>  | 0.16                                      | 0.03   | 0.18                                   | 0.03   | 0.2784          |
| <b>PSMB5</b> | 1.60                                      | 0.38   | 1.68                                   | 0.11   | 0.4904          |
| <b>NRF2</b>  | 0.017                                     | 0.002  | 0.018                                  | 0.0006 | 0.1488          |
| <b>XPB1</b>  | 0.45                                      | 0.03   | 0.44                                   | 0.05   | 0.7213          |
| <b>cMAF</b>  | 0.20                                      | 0.02   | 0.21                                   | 0.03   | 0.2588          |
| <b>MAFB</b>  | 1738.56                                   | 330.58 | 1720.33                                | 451.05 | 0.9203          |

**Table S7.** Normalized protein levels according to bone disease at the diagnosis. Data are presented as mean and SD.

| Variable     | Without bone<br>disease | SD     | Bone disease | SD     | <i>p</i> -value |
|--------------|-------------------------|--------|--------------|--------|-----------------|
| <b>POMP</b>  | 0.16                    | 0.03   | 0.16         | 0.03   | 0.5273          |
| <b>PSMB5</b> | 1.62                    | 0.25   | 1.60         | 0.44   | 0.8772          |
| <b>NRF2</b>  | 0.017                   | 0.002  | 0.017        | 0.002  | 0.8625          |
| <b>XPB1</b>  | 0.45                    | 0.02   | 0.44         | 0.04   | 0.7093          |
| <b>cMAF</b>  | 0.20                    | 0.02   | 0.20         | 0.02   | 0.4858          |
| <b>MAFB</b>  | 1772.42                 | 330.95 | 1677.26      | 356.10 | 0.3936          |

**Table S8.** Normalized protein levels according to the response to bortezomib-based chemotherapy according to the IMWG criteria. Data are presented as mean and SD.

| Variable     | $\geq$ VGPR | SD     | $<$ VGPR | SD     | <i>p</i> -value |
|--------------|-------------|--------|----------|--------|-----------------|
| <b>POMP</b>  | 0.16        | 0.03   | 0.17     | 0.03   | 0.3994          |
| <b>PSMB5</b> | 1.58        | 0.41   | 1.64     | 0.31   | 0.8107          |
| <b>NRF2</b>  | 0.018       | 0.002  | 0.016    | 0.002  | 0.0167          |
| <b>XPB1</b>  | 0.45        | 0.02   | 0.44     | 0.03   | 0.1234          |
| <b>cMAF</b>  | 0.20        | 0.02   | 0.20     | 0.02   | 0.6520          |
| <b>MAFB</b>  | 1761.34     | 374.04 | 1691.29  | 319.62 | 0.5320          |

**Table S9.** Normalized protein levels according to refractoriness to bortezomib. Data are presented as mean and SD.

| Variable     | Sensitive | SD     | Refractory | SD     | <i>p</i> -value |
|--------------|-----------|--------|------------|--------|-----------------|
| <b>POMP</b>  | 0.16      | 0.03   | 0.17       | 0.03   | 0.6819          |
| <b>PSMB5</b> | 1.63      | 0.38   | 1.56       | 0.31   | 0.1570          |
| <b>NRF2</b>  | 0.017     | 0.002  | 0.016      | 0.002  | 0.0863          |
| <b>XPB1</b>  | 0.45      | 0.03   | 0.44       | 0.03   | 0.1840          |
| <b>cMAF</b>  | 0.20      | 0.02   | 0.20       | 0.02   | 0.3194          |
| <b>MAFB</b>  | 1752.49   | 346.26 | 1665.87    | 342.37 | 0.4644          |

**Table S10.** The optimal cutpoints for protein levels determined by Cutoff Finder.

| Protein      | PFS           |                       |                       | OS            |                       |                       |
|--------------|---------------|-----------------------|-----------------------|---------------|-----------------------|-----------------------|
|              | Cut-off point | N below cut-off point | N above cut-off point | Cut-off point | N below cut-off point | N above cut-off point |
| <b>POMP</b>  | 0.1503        | 15                    | 24                    | 0.1729        | 28                    | 11                    |
| <b>PSMB5</b> | 1.525         | 17                    | 22                    | 1.713         | 24                    | 15                    |
| <b>NRF2</b>  | 0.01786       | 28                    | 11                    | 0.01786       | 28                    | 11                    |
| <b>XPB1</b>  | 0.4267        | 11                    | 28                    | 0.4612        | 26                    | 13                    |
| <b>cMAF</b>  | 0.2078        | 22                    | 17                    | 0.1899        | 14                    | 25                    |
| <b>MAFB</b>  | 1638          | 16                    | 23                    | 1501          | 11                    | 28                    |

**Table S11.** Univariate Cox regression analyses of dichotomized protein levels for progression-free survival for patients without previous treatment (N=29).

| Variables         | PFS         |                 |       |        |       |
|-------------------|-------------|-----------------|-------|--------|-------|
|                   | Coefficient | <i>p</i> -value | HR    | 95% CI |       |
| <b>High POMP</b>  | -0.233      | 0.2790          | 0.627 | 0.269  | 1.460 |
| <b>High PSMB5</b> | 0.308       | 0.1530          | 1.851 | 0.796  | 4.308 |
| <b>High NRF2</b>  | -0.157      | 0.4547          | 0.731 | 0.321  | 1.664 |
| <b>High XPB1</b>  | 0.184       | 0.3799          | 1.45  | 0.635  | 3.287 |
| <b>High cMAF</b>  | 0.352       | 0.0988          | 2.020 | 0.876  | 4.658 |
| <b>High MAFB</b>  | -0.403      | 0.0554          | 0.446 | 0.195  | 1.019 |

**Table S12.** The optimal cutpoints for protein levels determined by Cutoff Finder for PFS of patients without previous treatment (N=29).

| <b>PFS</b>     |               |         |         |
|----------------|---------------|---------|---------|
| <b>Protein</b> | Cut-off point | N below | N above |
| <b>POMP</b>    | 0.1532        | 10      | 19      |
| <b>PSMB5</b>   | 1.525         | 12      | 17      |
| <b>NRF2</b>    | 0.01614       | 11      | 18      |
| <b>XBP1</b>    | 0.4628        | 19      | 10      |
| <b>cMAF</b>    | 0.2081        | 16      | 13      |
| <b>MAFB</b>    | 1638          | 12      | 17      |
